# Supplementary material for: Biliary Elimination of Cholesterol Can Be Modulated by Hepatocyte Mitochondrial Aquaporin-8 in Mice
Source: Research Square preprint supplement (doi:10.21203/rs.3.rs-8058626/v1), 2025-12-01
Supplement: Supplementary file 1 [file f8bf5f816082f1293745edee.pdf]

**Figure 1 mitochondrial AQP8**

C= control

Sh=short hairpin targeting AQP8  
(AdAQP8sh)

**TIFF AQP8**

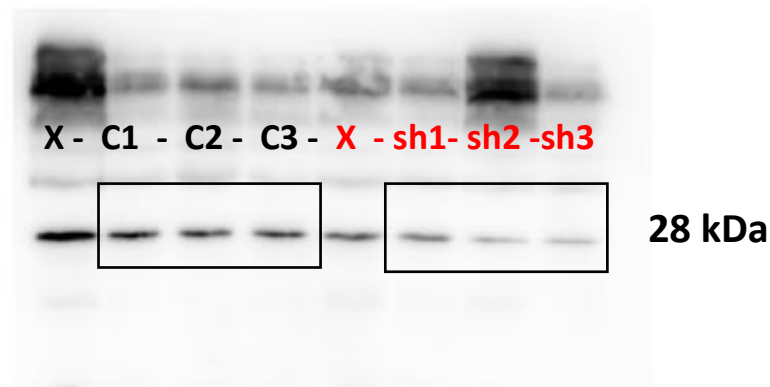

**TIFF Prohibitin**

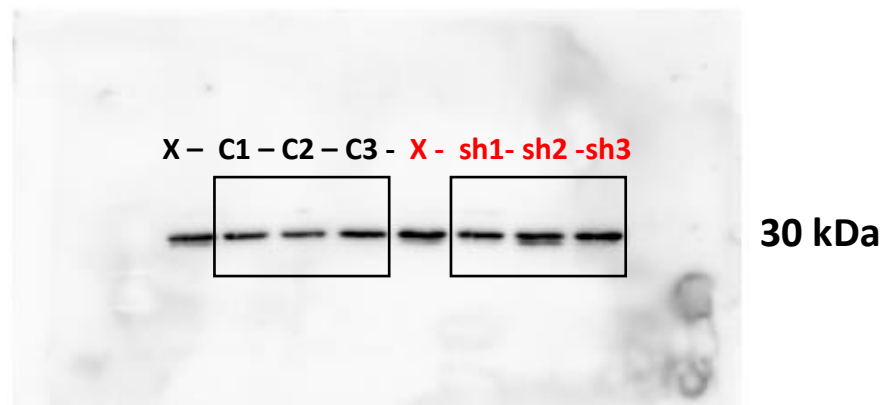

*Bands depicted with a "X" were not included in the Figures.*

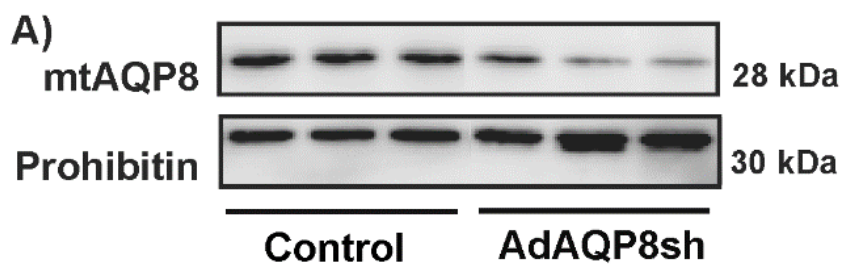

**Figure 2 SREBP-2 total lysate**

C= control

Sh=short hairpin targeting AQP8  
(AdAQP8sh)

**TIFF SREBP-2**

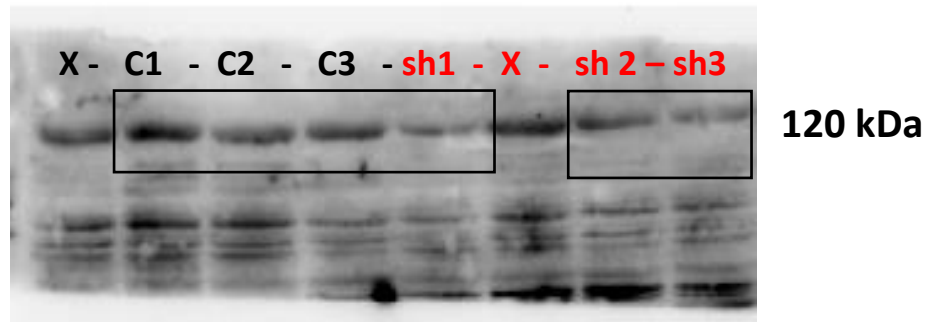

**TIFF Actin**

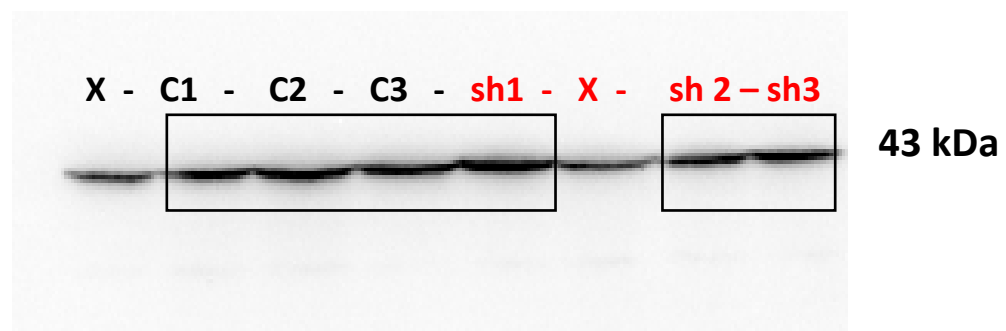

*Bands depicted with a "x" were not included in the Figures.*

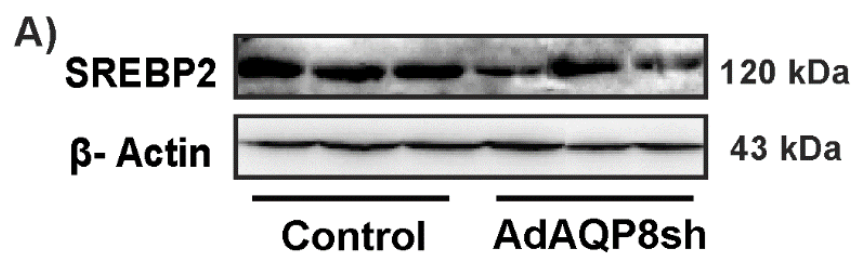

**Figure 2 LXR total lysate**

C= control

Sh=short hairpin targeting AQP8  
(AdAQP8sh)

**TIFF LXR**

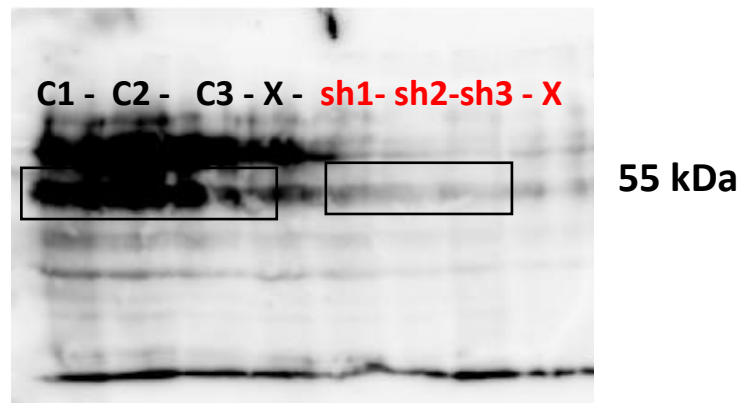

**TIFF Actin**

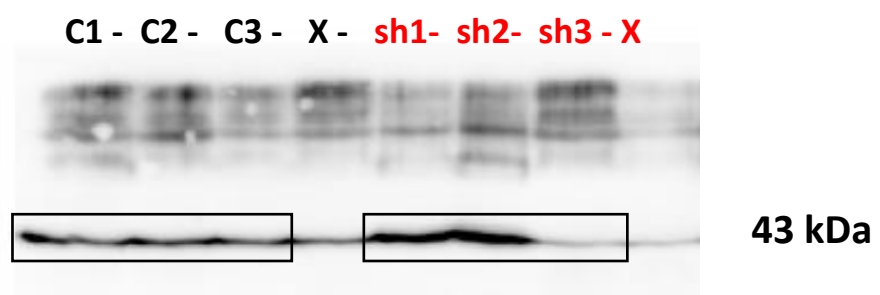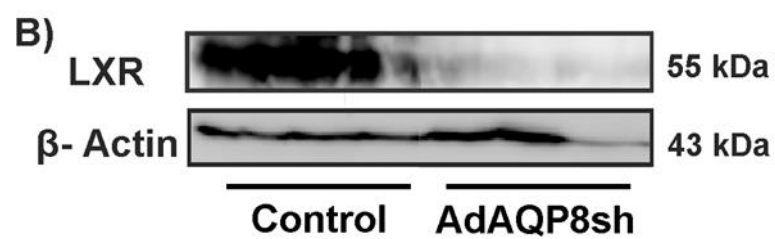

C= control

Sh=short hairpin targeting AQP8  
(AdAQP8sh)

Figure 3 ABCG5 total lysate

TIFF ABCG5

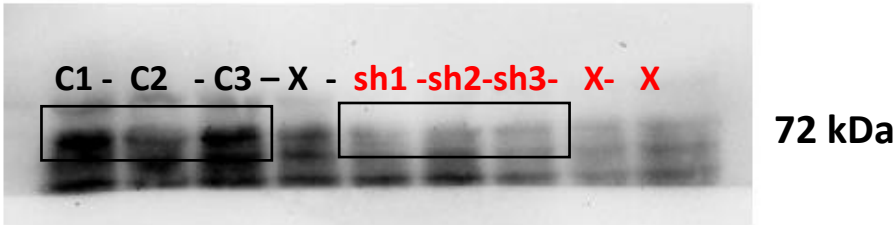

TIFF Actin

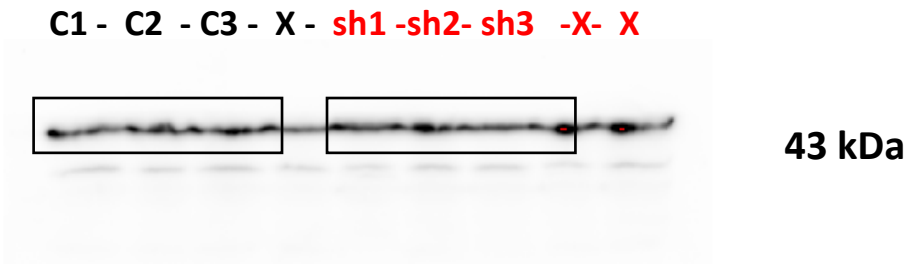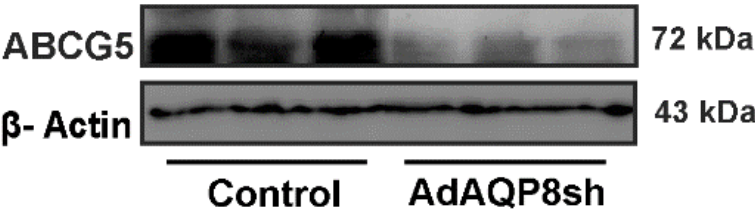

**Figure 3 ABCG5 canalicular membrane**

C= control

Sh=short hairpin targeting AQP8  
(AdAQP8sh)

**TIFF ABCG5**

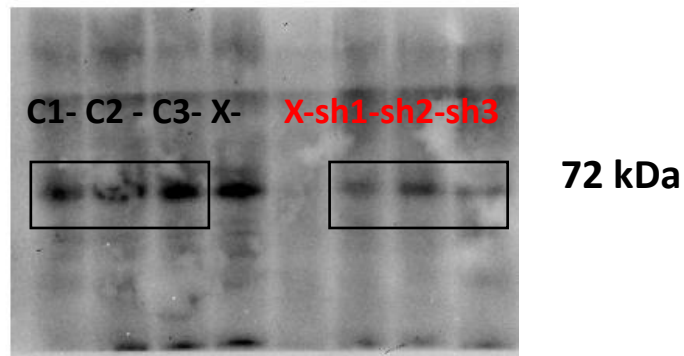

**TIFF Actin**

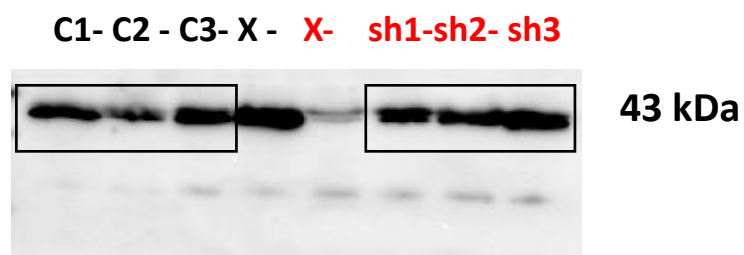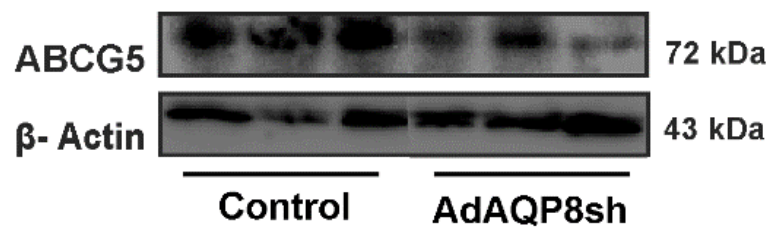

*Bands depicted with a "X" were not included in the Figures.*

**Figure 4 mitochondrial hAQP8**

C= control

AQ= treated with adenovector expressing hAQP8 (AdhAQP8)

**TIFF hAQP8**

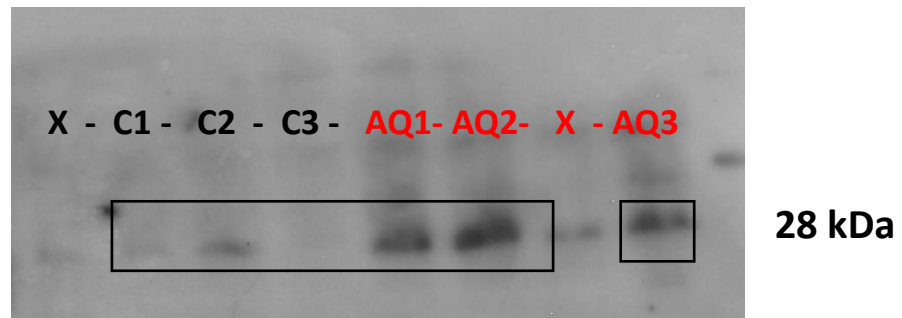

**TIFF PROHIBITIN**

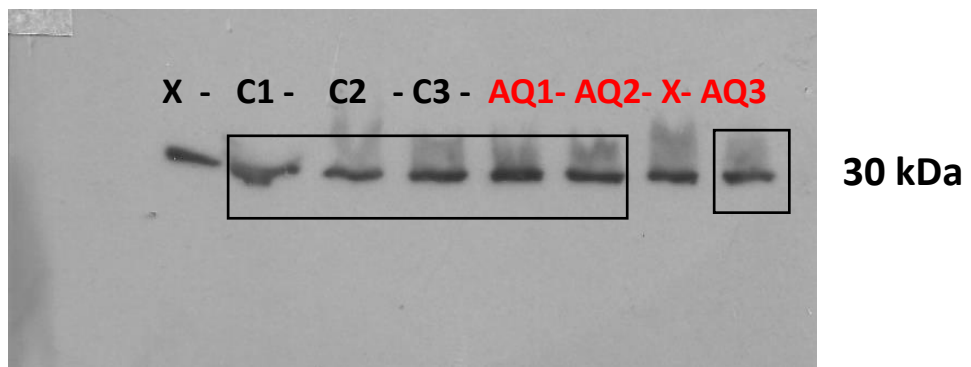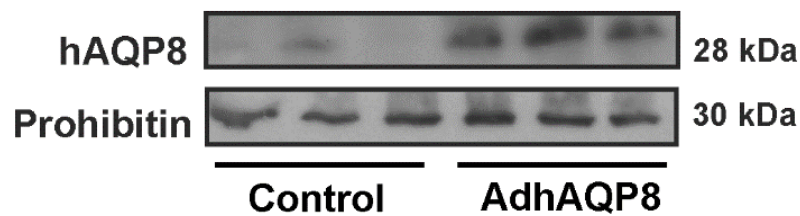

*Bands depicted with a "X" were not included in the Figures.*

**Figure 5 SREBP-2 TOTAL LYSATE**

C= control  
AQ= treated with adenovector expressing hAQP8 (AdhAQP8)

**TIFF SREBP-2**

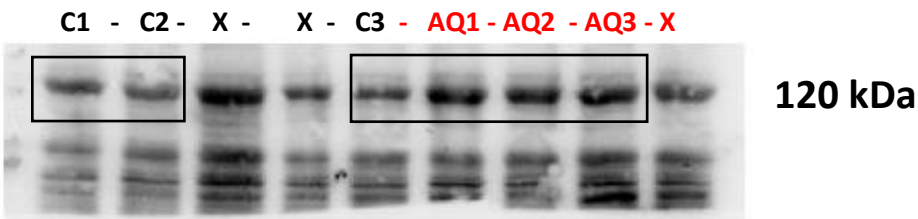

**TIFF Actin**

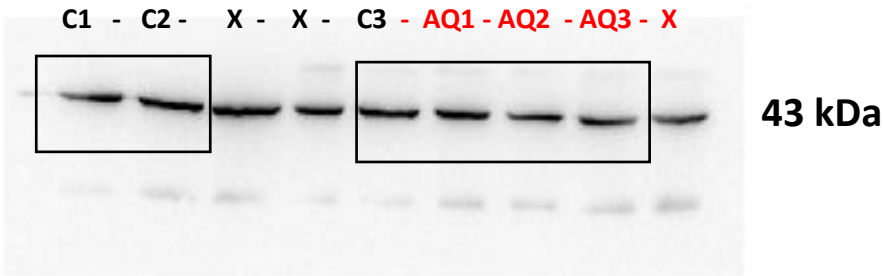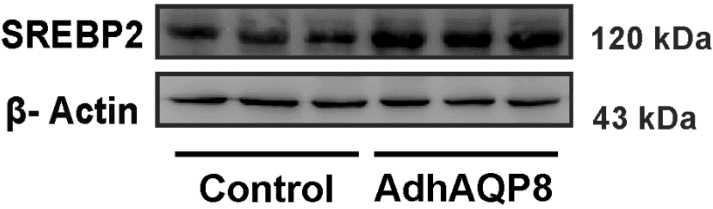

## Figure 5 LXR TOTAL LYSATE

C= control

AQ= treated with adenovector expressing hAQP8 (AdhAQP8)

### TIFF LXR

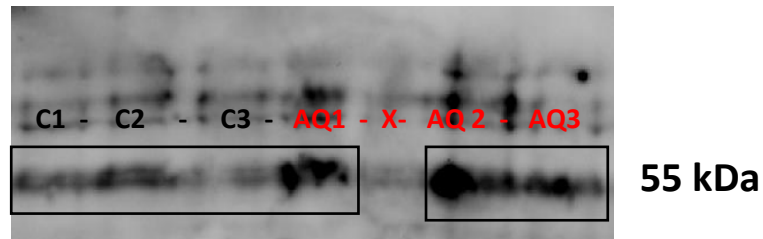

### TIFF Actin

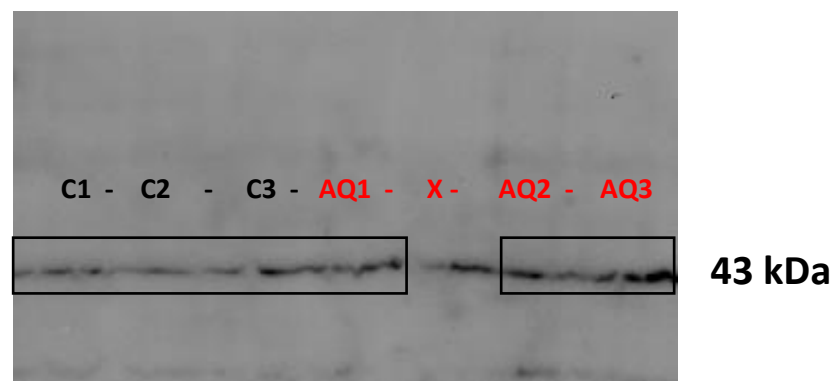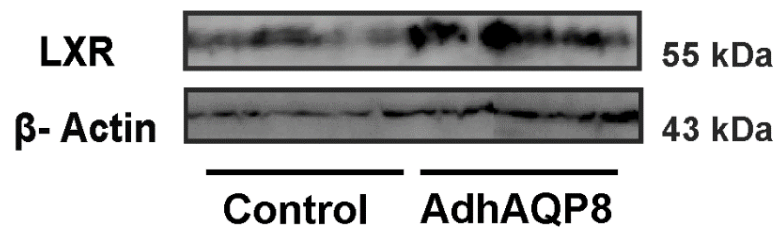

*Bands depicted with a "X" were not included in the Figures.*



## Figure 6 ABCG5 TOTAL LYSATE

C= control

AQ= treated with adenovector expressing hAQP8 (AdhAQP8)

### TIFF ABCG5

C1 - C2 - C3 - AQ1- AQ2-AQ3- X- X

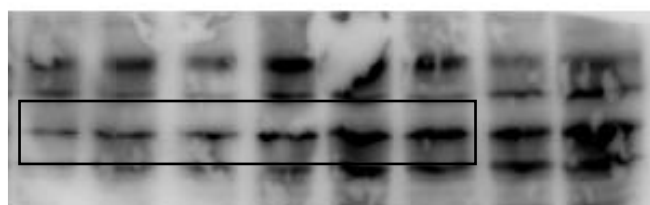

72 kDa

### TIFF Actin

C1 - C2 - C3 - AQ1- AQ2-AQ3- X - X

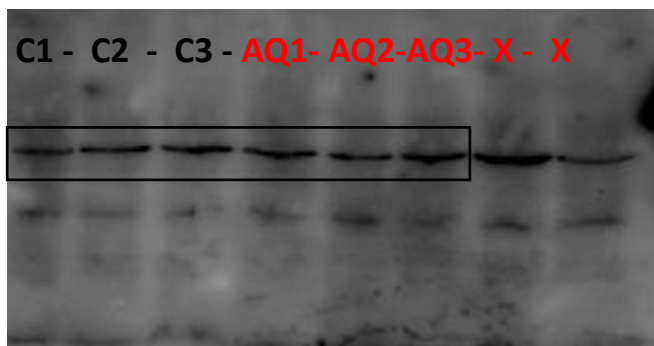

43 kDa

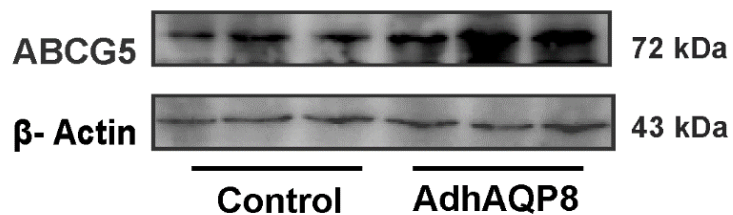

## Figure 6 ABCG5 canalicular membrane

C= control

AQ= treated with adenovector  
expressing hAQP8 (AdhAQP8)

### TIFF ABCG5

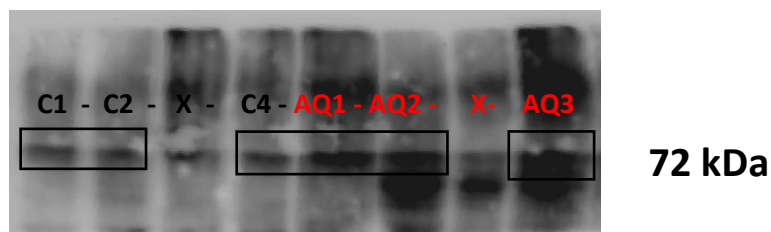

### TIFF Actin

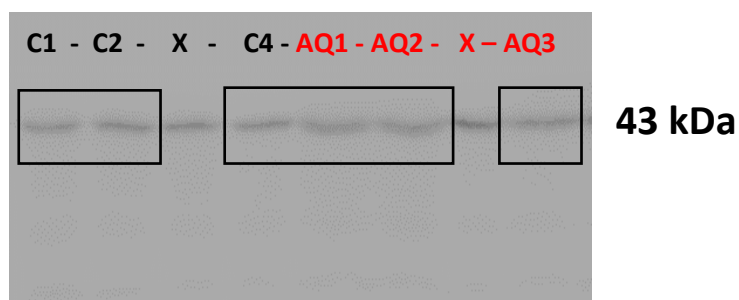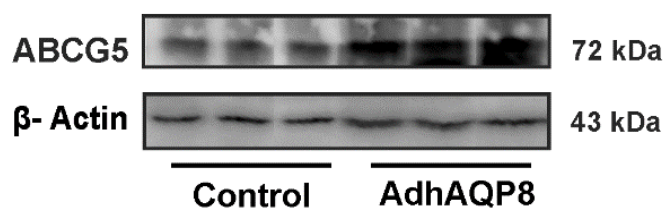

*Bands depicted with a "X" were not included in the Figures.*

## Figure 7 mitochondrial hAQP1

C= control

AQ= treated with adenovector expressing hAQP1 (AdhAQP1)

C+= positive control

### TIFF AQP1

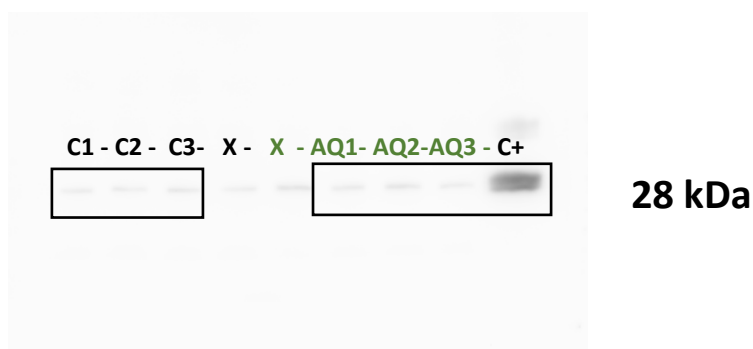

### TIFF Prohibitin

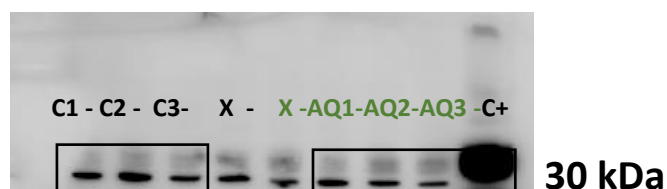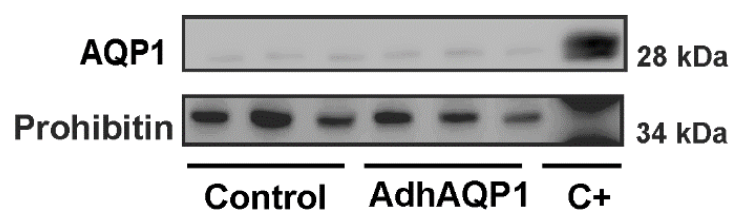

**Figure 7 hAQP1 TOTAL LYSATE**

C= control  
AQ= treated with adenovector  
expressing hAQP1 (AdhAQP1)

**TIFF AQP1**

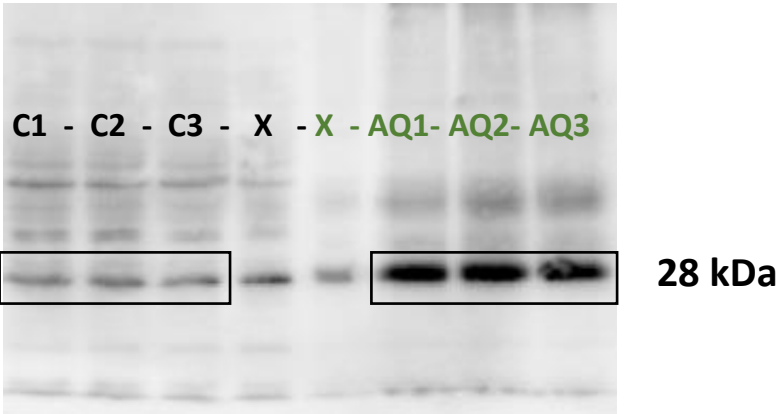

**TIFF Actin**

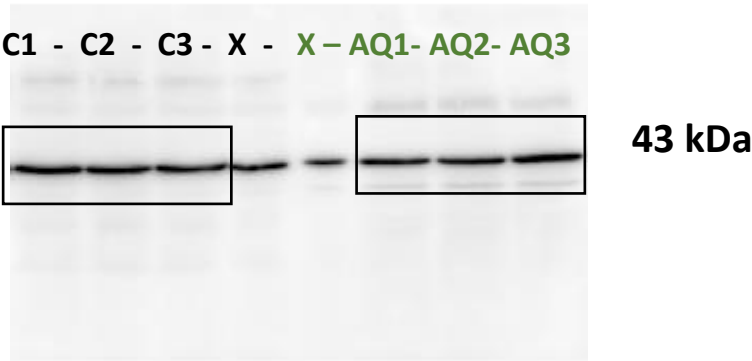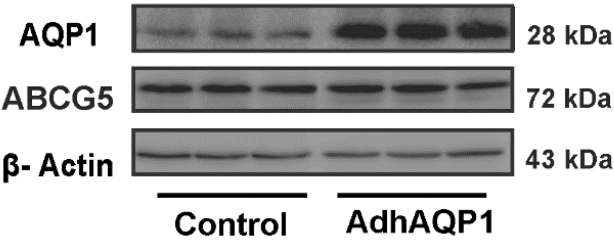

**Figure 7 hAQP1 TOTAL LYSATE**

C= control

AQ= treated with adenovector  
expressing hAQP1 (AdhAQP1)

**TIFF ABCG5**

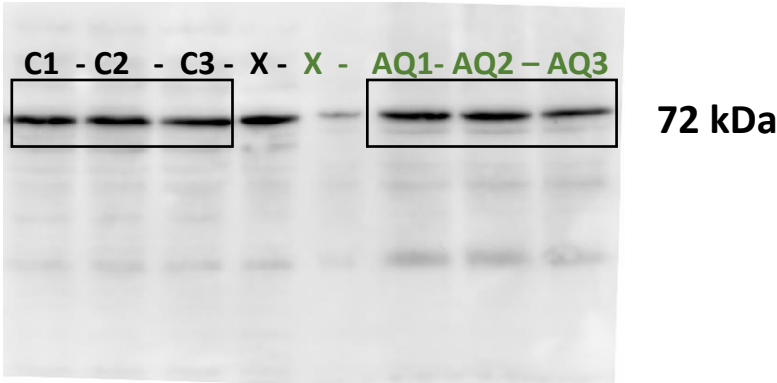

**TIFF Actin**

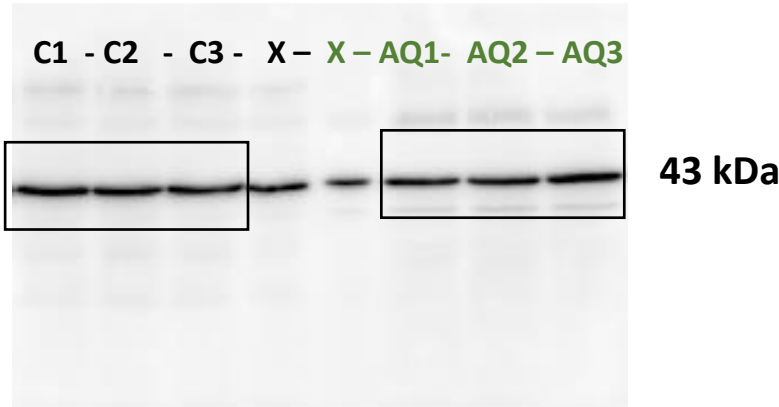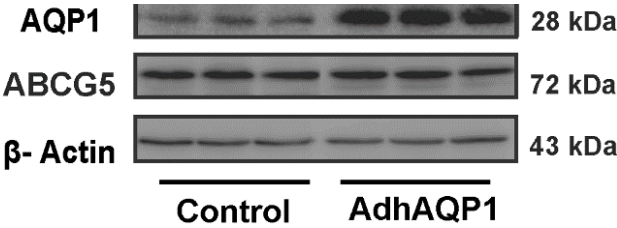

*Bands depicted with a "X" were not included in the Figures.*

## Figure 8 mitochondrial hAQP8

AQP= treated with adenovector expressing hAQP8 (AdhAQP8)

MA= treated with adenovector expressing hAQP8 (AdhAQP8) + mitotempo

### TIFF hAQP8

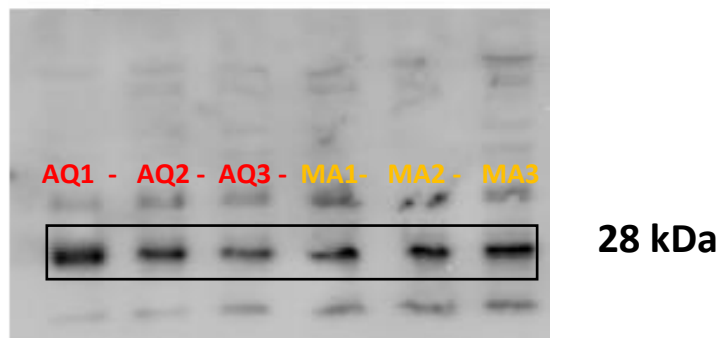

### TIFF Prohibitin

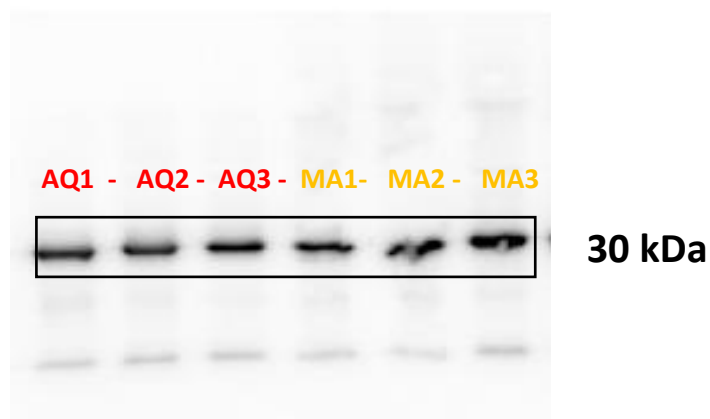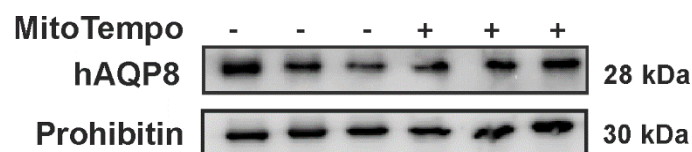

*Bands depicted with a "X" were not included in the Figures.*

## Figure 8 SREBP-2 TOTAL LYSATE

AQP= treated with adenovector expressing hAQP8 (AdhAQP8)

MA= treated with adenovector expressing hAQP8 (AdhAQP8) + mitotempo

### TIFF SREBP-2

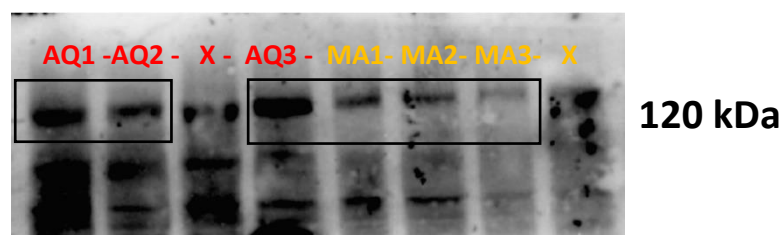

### TIFF Actin

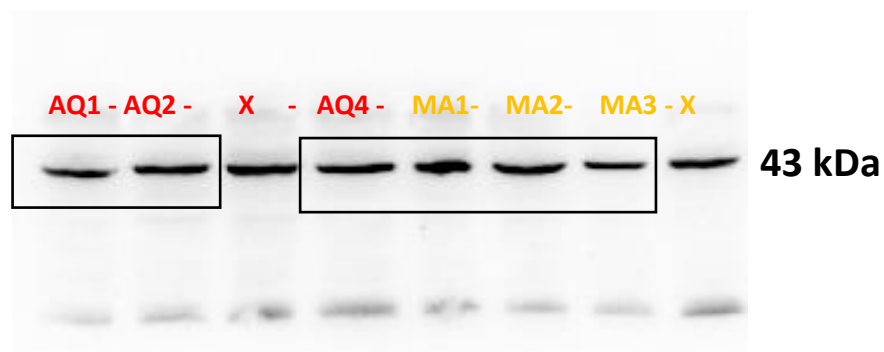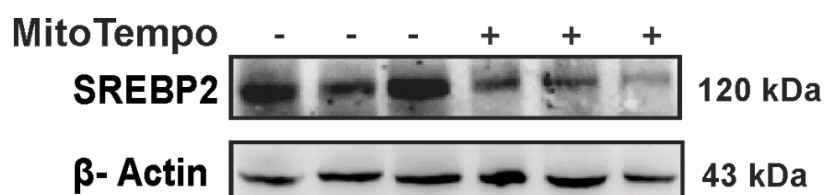

*Bands depicted with a "X" were not included in the Figures.*

**Figure 8 ABCG5 TOTAL LYSATE**

AQP= treated with adenovector expressing hAQP8 (AdhAQP8)

MA= treated with adenovector expressing hAQP8 (AdhAQP8) + mitotempo

**TIFF ABCG5**

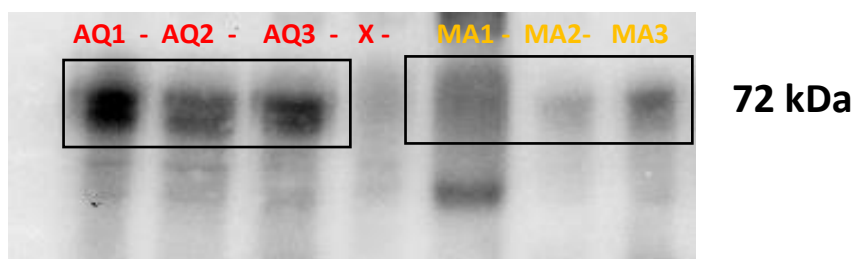

**TIFF Actin**

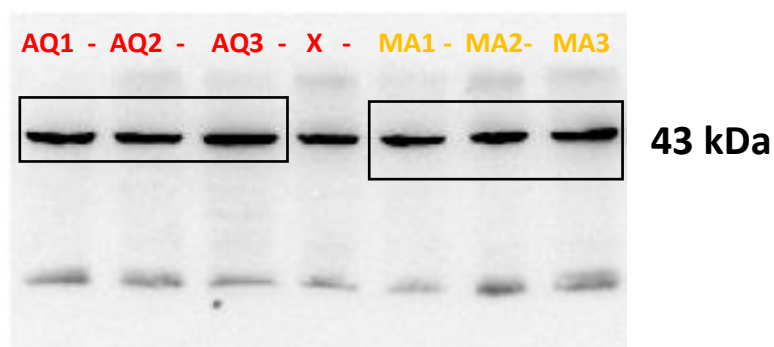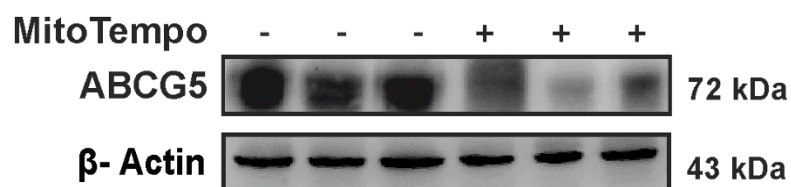

*Bands depicted with a "X" were not included in the Figures.*
